# Supplementary material for: Systematic reviews in paediatric multiple sclerosis and Creutzfeldt-Jakob disease exemplify shortcomings in methods used to evaluate therapies in rare conditions
Source: PubMed Central journal article supplement (PMC4761188; doi:10.1186/s13023-016-0402-6), 2016-02-20
Supplement: 13023_2016_402_MOESM1_ESM.pdf [file 13023_2016_402_MOESM1_ESM.pdf]

## Supplementary web material

**Table S1:** PRISMA checklist of 27 items (n/a: not applicable).

| Section/<br>topic                  | #  | Checklist item                                                                                                                                                                                                                                                                                              | Reported<br>on page # |
|------------------------------------|----|-------------------------------------------------------------------------------------------------------------------------------------------------------------------------------------------------------------------------------------------------------------------------------------------------------------|-----------------------|
| <b>TITLE</b>                       |    |                                                                                                                                                                                                                                                                                                             |                       |
| Title                              | 1  | Identify the report as a systematic review, meta-analysis, or both.                                                                                                                                                                                                                                         | 1                     |
| <b>ABSTRACT</b>                    |    |                                                                                                                                                                                                                                                                                                             |                       |
| Structured summary                 | 2  | Provide a structured summary including, as applicable: background; objectives; data sources; study eligibility criteria, participants, and interventions; study appraisal and synthesis methods; results; limitations; conclusions and implications of key findings; systematic review registration number. | 2                     |
| <b>INTRODUCTION</b>                |    |                                                                                                                                                                                                                                                                                                             |                       |
| Rationale                          | 3  | Describe the rationale for the review in the context of what is already known.                                                                                                                                                                                                                              | 3,4,5                 |
| Objectives                         | 4  | Provide an explicit statement of questions being addressed with reference to participants, interventions, comparisons, outcomes, and study design (PICOS).                                                                                                                                                  | 3,4,5                 |
| <b>METHODS</b>                     |    |                                                                                                                                                                                                                                                                                                             |                       |
| Protocol and registration          | 5  | Indicate if a review protocol exists, if and where it can be accessed (e.g., Web address), and, if available, provide registration information including registration number.                                                                                                                               | n/a                   |
| Eligibility criteria               | 6  | Specify study characteristics (e.g., PICOS, length of follow-up) and report characteristics (e.g., years considered, language, publication status) used as criteria for eligibility, giving rationale.                                                                                                      | 6                     |
| Information sources                | 7  | Describe all information sources (e.g., databases with dates of coverage, contact with study authors to identify additional studies) in the search and date last searched.                                                                                                                                  | 6                     |
| Search                             | 8  | Present full electronic search strategy for at least one database, including any limits used, such that it could be repeated.                                                                                                                                                                               | 6                     |
| Study selection                    | 9  | State the process for selecting studies (i.e., screening, eligibility, included in systematic review, and, if applicable, included in the meta-analysis).                                                                                                                                                   | 6                     |
| Data collection process            | 10 | Describe method of data extraction from reports (e.g., piloted forms, independently, in duplicate) and any processes for obtaining and confirming data from investigators.                                                                                                                                  | 7                     |
| Data items                         | 11 | List and define all variables for which data were sought (e.g., PICOS, funding sources) and any assumptions and simplifications made.                                                                                                                                                                       | 7                     |
| Risk of bias in individual studies | 12 | Describe methods used for assessing risk of bias of individual studies (including specification of whether this was done at the study or outcome level), and how this information is to be used in any data synthesis.                                                                                      | 7,8                   |
| Summary measures                   | 13 | State the principal summary measures (e.g., risk ratio, difference in means).                                                                                                                                                                                                                               | 7,8                   |
| Synthesis of results               | 14 | Describe the methods of handling data and combining results of studies, if done, including measures of consistency (e.g., $I^2$ ) for each meta-analysis.                                                                                                                                                   | n/a                   |

**Table S1:** PRISMA checklist of 27 items (continued).

| Section/<br>topic             | #  | Checklist item                                                                                                                                                                                           | Reported<br>on page # |
|-------------------------------|----|----------------------------------------------------------------------------------------------------------------------------------------------------------------------------------------------------------|-----------------------|
| Risk of bias across studies   | 15 | Specify any assessment of risk of bias that may affect the cumulative evidence (e.g., publication bias, selective reporting within studies).                                                             | n/a                   |
| Additional analyses           | 16 | Describe methods of additional analyses (e.g., sensitivity or subgroup analyses, meta-regression), if done, indicating which were pre-specified.                                                         | n/a                   |
| <b>RESULTS</b>                |    |                                                                                                                                                                                                          |                       |
| Study selection               | 17 | Give numbers of studies screened, assessed for eligibility, and included in the review, with reasons for exclusions at each stage, ideally with a flow diagram.                                          | 8,9                   |
| Study characteristics         | 18 | For each study, present characteristics for which data were extracted (e.g., study size, PICOS, follow-up period) and provide the citations.                                                             | 9,10,11,12            |
| Risk of bias within studies   | 19 | Present data on risk of bias of each study and, if available, any outcome level assessment (see item 12).                                                                                                | 12                    |
| Results of individual studies | 20 | For all outcomes considered (benefits or harms), present, for each study: (a) simple summary data for each intervention group (b) effect estimates and confidence intervals, ideally with a forest plot. | n/a                   |
| Synthesis of results          | 21 | Present results of each meta-analysis done, including confidence intervals and measures of consistency.                                                                                                  | n/a                   |
| Risk of bias across studies   | 22 | Present results of any assessment of risk of bias across studies (see Item 15).                                                                                                                          | n/a                   |
| Additional analysis           | 23 | Give results of additional analyses, if done (e.g., sensitivity or subgroup analyses, meta-regression [see Item 16]).                                                                                    | n/a                   |
| <b>DISCUSSION</b>             |    |                                                                                                                                                                                                          |                       |
| Summary of evidence           | 24 | Summarize the main findings including the strength of evidence for each main outcome; consider their relevance to key groups (e.g., healthcare providers, users, and policy makers).                     | 13,14                 |
| Limitations                   | 25 | Discuss limitations at study and outcome level (e.g., risk of bias), and at review-level (e.g., incomplete retrieval of identified research, reporting bias).                                            | 14,15                 |
| Conclusions                   | 26 | Provide a general interpretation of the results in the context of other evidence, and implications for future research.                                                                                  | 15,16,17              |
| <b>FUNDING</b>                |    |                                                                                                                                                                                                          |                       |
| Funding                       | 27 | Describe sources of funding for the systematic review and other support (e.g., supply of data); role of funders for the systematic review.                                                               | 17                    |

**Table S2:** Classification scheme of the ANN for assigning levels of evidence for therapeutic questions (see [24]).

| Level of evidence | Description                                                                                                                                                                                                                                                                                                                                                                                                                                                                                                                                                                                                                                                                                                                |
|-------------------|----------------------------------------------------------------------------------------------------------------------------------------------------------------------------------------------------------------------------------------------------------------------------------------------------------------------------------------------------------------------------------------------------------------------------------------------------------------------------------------------------------------------------------------------------------------------------------------------------------------------------------------------------------------------------------------------------------------------------|
| Class I           | <p>RCT of the intervention of interest with masked or objective outcome assessment, in a representative population. Relevant baseline characteristics are presented and substantially equivalent among treatment groups or there is appropriate statistical adjustment for differences. The following criteria must be fulfilled:</p> <ul style="list-style-type: none"> <li>(a) concealed allocation,</li> <li>(b) primary outcome(s) clearly defined,</li> <li>(c) exclusion/inclusion criteria clearly defined,</li> <li>(d) adequate accounting for dropouts (with at least 80% of enrolled subjects completing the study) and crossovers with numbers sufficiently low to have minimal potential for bias.</li> </ul> |
| Class II          | <p>RCT of the intervention of interest in a representative population with masked or objective outcome assessment that lacks one of the criteria (a)-(d) stated above.</p> <p>Prospective matched cohort study with masked or objective outcome assessment in a representative population that meets the criteria (b)–(d) stated above. Relevant baseline characteristics are presented and substantially equivalent among treatment groups or there is appropriate statistical adjustment for differences.</p>                                                                                                                                                                                                            |
| Class III         | <p>All other controlled trials (including well-defined natural history controls or patients serving as their own controls) in a representative population, where outcome is independently assessed, or independently derived by objective outcome measurements.</p>                                                                                                                                                                                                                                                                                                                                                                                                                                                        |
| Class IV          | <p>Studies not meeting class I, II, or III criteria including consensus or expert opinion.</p>                                                                                                                                                                                                                                                                                                                                                                                                                                                                                                                                                                                                                             |

**Table S3:** Summary of the characteristics on the twelve selected studies on paediatric MS.

| Ref. | Study design  | Primary Objectives                                                                        | Endpoints                                                                                                                                                            | Participants                                                                                               | Randomisation and masking | Intervention                                                                                             | Control                            | Statistical methodology                                                                                                               |
|------|---------------|-------------------------------------------------------------------------------------------|----------------------------------------------------------------------------------------------------------------------------------------------------------------------|------------------------------------------------------------------------------------------------------------|---------------------------|----------------------------------------------------------------------------------------------------------|------------------------------------|---------------------------------------------------------------------------------------------------------------------------------------|
| [28] | Observ. study | Assess safety, tolerability and efficacy of interferon beta-1 a in paediatric MS patients | Safety and tolerability outcomes, Relapse rate                                                                                                                       | Total analysis set: 307 patients, multiple sclerosis analysis set (with confirmed diagnosis): 298 patients | n/a                       | Different doses of inteferon beta-1 were given to the 307 patients                                       | Dose-comparison controls           | Descriptive statistics, Poisson regression Kaplan-Meier survival curves                                                               |
| [29] | Observ. study | Assess effects of natalizumab in patients with paediatric MS.                             | Relapse rate, EDSS score, frequency of patients free from clincial activity                                                                                          | 55 patients                                                                                                | n/a                       | Treatment with natalizumab                                                                               | none                               | Paired t-test Kaplan-Meier estimates                                                                                                  |
| [30] | Observ. study | Assess effects of natalizumab in patients with paediatric MS.                             | Relapse rate, EDSS score, number of new lesions, number of adverse events, prevalence of neutralizing antibodies against natalizumab, serum JC virus antibody status | 20 patients                                                                                                | n/a                       | Treatment with natalizumab                                                                               | none                               | Descriptive statistics, paired t-tests and Wilcoxon signed rank tests. Bonferroni correction was used to adjust for multiple testing. |
| [31] | Observ. study | Assess effects of immunomodulatory agents in patients with paediatric MS                  | Relapse rate, EDSS score                                                                                                                                             | 130 patients with disease onset before 16 years of age                                                     | n/a                       | 77 subjects were treated with Avonex, 36 were treated with Rebif, 3 with Betaferon and 14 with Copaxone. | Active treatment controls          | Wilcoxon rank-sum test                                                                                                                |
| [32] | Observ. study | Assess efficacy of beta interferon in in patients with paediatric MS                      | Time to first subsequent attack, severe disability occurrence                                                                                                        | Cohort of 197 pediatic MS patients younger than 16 years of age.                                           | n/a                       | Treatment with beta interferon given to 24 patients                                                      | No treatment given to 173 patients | Chi-square test , Fisher's exact test, t-test, Wilcoxon test, Kaplan-Meier estimates, Cox models                                      |

**Table S3:** Summary of the characteristics on the twelve selected studies on paediatric MS (continued).

| Ref. | Study design  | Primary Objectives                                                         | Endpoints                                           | Participants                                                                            | Randomisation and masking                              | Intervention                                                                                                                                                  | Control                         | Statistical methodology                 |
|------|---------------|----------------------------------------------------------------------------|-----------------------------------------------------|-----------------------------------------------------------------------------------------|--------------------------------------------------------|---------------------------------------------------------------------------------------------------------------------------------------------------------------|---------------------------------|-----------------------------------------|
| [33] | Observ. study | Assess safety, tolerability and efficacy of interferon beta-1a             | Relapse rate, EDSS score, number of adverse events  | 52 patients with experienced onset of symptoms of MS before age 16                      | n/a                                                    | Treatment with interferon beta-1a                                                                                                                             | none                            | Wilcoxon rank-sum test                  |
| [34] | Observ. study | Assess safety, tolerability and efficacy of interferon beta-1a             | Relapse rate, EDSS score, number of adverse events  | 24 patients                                                                             | n/a                                                    | Treatment with interferon beta-1a in different dose-escalation phases                                                                                         | none                            | Wilcoxon signed-rank test               |
| [35] | RCT           | Assess safety and efficacy of interferon beta-1a in paediatric MS patients | Relapse rate, EDSS score, new lesions, side effects | 16 patients with definite relapsing-remitting MS under the age of 16                    | Method of randomisation is not described. No blinding. | 8 patients received interferon beta-1a                                                                                                                        | 8 patients received no therapy. | t-test for two independent samples      |
| [36] | Observ. study | Assess safety, tolerability and efficacy of interferon beta-1b             | Relapse rate, number of adverse events              | Cohort of 43 patients with early-onset MS                                               | n/a                                                    | Exposure to interferon beta-1b                                                                                                                                | none                            | Descriptive statistics                  |
| [37] | Observ. study | Assess effectiveness and safety of interferon-beta and glatiramer acetate  | Relapse rate, EDSS score, number of adverse events  | 81 patients with, onset of the disease before age 16                                    | n/a                                                    | 51 patients were treated with interferon beta-1a once weekly, 19 with interferon beta three times weekly and 11 with glatiramer acetate.                      | Active treatment controls       | Descriptive statistics<br>Paired t-test |
| [38] | Observ. study | Assess effectiveness and safety of interferon-beta and glatiramer acetate  | Relapse rate, EDSS score, number of adverse events  | 76 patients with onset of the disease before age 16. Results evaluated for 65 subjects. | n/a                                                    | 38 patients treated with interferon beta-1a once weekly (Avonex), 18 with interferon beta three times weekly (Rebif/Betaferon) and 9 with glatiramer acetate. | Active treatment controls       | Descriptive statistics<br>Paired t-test |
| [39] | Observ. study | Assess effectiveness and safety of interferon-beta                         | Relapse rate, EDSS score, number of adverse events  | 51 patients with a disease manifestation before age 16 years.                           | n/a                                                    | Treatment with interferon beta-1a                                                                                                                             | None                            | Descriptive statistics                  |

**Table S4:** Summary of the characteristics on the seven selected studies on evaluations of therapeutic interventions in CJD.

| Ref. | Study design  | Primary Objectives                                                              | Endpoints                                             | Participants                                                                             | Randomisation and masking                                                                                                                                    | Intervention                                  | Control                                               | Statistical methodology                                       |
|------|---------------|---------------------------------------------------------------------------------|-------------------------------------------------------|------------------------------------------------------------------------------------------|--------------------------------------------------------------------------------------------------------------------------------------------------------------|-----------------------------------------------|-------------------------------------------------------|---------------------------------------------------------------|
| [40] | RCT           | Assess efficacy of doxycycline on survival in patients with CJD                 | Time-to-event endpoints                               | 121 patients (Italy: 55, France: 66) with diagnosis of definite or probable CJD          | Minimisation method (Italy), simple randomisation (France); double-blind trial                                                                               | Doxycycline given to 62 patients              | Placebo given to 59 patients                          | Log-rank test, Cox model                                      |
| [41] | RCT           | Assess efficacy of quinacrine on survival in patients with sCJD                 | Time-to-event endpoints                               | 51 patients with sCJD                                                                    | Double-blind stratified randomisation; subjects were offered open-label quinacrine at month 2.                                                               | Quinacrine given to 23 patients.              | Placebo given to 28 patients                          | Log-rank test, Cox models                                     |
| [42] | Observ. study | Assess efficacy of doxycycline on survival in patients with sCJD                | Time-to-event endpoints                               | 70 patients with probable sCJD                                                           | n/a                                                                                                                                                          | Doxycycline given to 28 patients              | 42 historic patients without treatment                | Median survival time, log-rank test, Cox model                |
| [43] | Observ. study | Assess efficacy of quinacrine in patients with various prion diseases           | Time-to-event endpoints                               | 107 patients with forms of prion disease (23 in a pilot study and 84 in the main study.) | Patients were offered a choice between quinacrine, no quinacrine, or (stratified) randomisation to immediate quinacrine or deferred quinacrine. No blinding. | Main trial: 24 chose immediate quinacrine     | Main trial: 59 chose no quinacrine                    | Kaplan-Meier curves, log-rank tests and Cox models            |
| [44] | Observ. study | Assess efficacy of doxycycline on survival in patients with CJD                 | Time-to-event endpoint                                | 99 patients with probable CJD                                                            | n/a                                                                                                                                                          | Doxycycline given to 21 patients              | 78 patients with no treatment                         | Median survival time, log-rank test                           |
| [45] | Observ. study | Assess efficacy of quinacrine in patients with sCJD and vCJD.                   | Time-to-event endpoint, difference in Rankin score    | 157 patients with probable or definite sCJD or vCJD                                      | n/a                                                                                                                                                          | Quinacrine given to 32 patients (2 with vCJD) | 125 untreated patients with probable or definite sCJD | Mean survival time<br>Two-sample t-test, absolute frequencies |
| [46] | RCT           | To assess the efficacy of flupirtine on cognitive decline in patients with CJD. | Difference in ADAS-Cog score, time-to-event endpoints | 28 patients with CJD                                                                     | Randomised double-blind trial                                                                                                                                | Flupirtine given to 13 patients               | Placebo given to 15 patients                          | t-test, median survival time, log-rank test                   |
